# Supplementary material for: Interferon-β deficiency at asthma exacerbation promotes MLKL mediated necroptosis
Source: PubMed Central journal article supplement (PMC5844912; doi:10.1038/s41598-018-22557-6), 2018-03-09
Supplement: 41598_2018_22557_MOESM1_ESM.pdf [file 41598_2018_22557_MOESM1_ESM.pdf]

1 **Supplementary**

2

3 **Interferon- $\beta$  deficiency at asthma exacerbation promotes MLKL**  
4 **mediated necroptosis**

5

6

7 **Authors:** Samuel C. Cerps<sup># 1</sup>, Mandy Menzel<sup># 1</sup>, Irma Mahmutovic Persson<sup>1</sup>, Leif Bjermer<sup>2</sup>,  
8 Hamid Akbarshahi <sup>1,2</sup>, Lena Uller\* <sup>1</sup>

9

10 1: Unit of Respiratory Immunopharmacology, Department of Experimental Medicine, Lund University

11 2: Respiratory Medicine and Allergology, Lund University.

12

13 **\* Corresponding author:**

14 Lena Uller,

15 [lena.uller@med.lu.se](mailto:lena.uller@med.lu.se),

16 phone: 0046 222 04 13

17 Sölvegatan 19,

18 BMC D12, Lund

19

20

21

22

23  
24

## 25 **Materials and Methods**

26

### 27 **Western-blot analysis**

28 Equal protein amount of lung homogenate were diluted in 1:1 volume sample Laemmli buffer  
29 (Sigma-Aldrich, Stockholm, Sweden) and boiled for 5 min. The extracts were loaded on a 15  $\mu$ L  
30 well Mini-protean TGX gel (Bio-Rad, Stockholm, Sweden) and separated by gel electrophoresis  
31 using a mini protean tetra cell system electrophoresis chamber (Bio-Rad, Stockholm, Sweden).  
32 The proteins were then transferred to TransBlot Turbo mini nitrocellulose membrane (Bio-Rad,  
33 Stockholm, Sweden) with Trans-blot Turbo transfer system (Bio-Rad, Stockholm, Sweden) and  
34 then blocked in 5% milk or 5 % BSA (Sigma-Aldrich, Stockholm, Sweden), TBS-T (20 mM Tris-  
35 base, 137 mM NaCl, 0,1 % Tween 20). Following primary antibodies were used and diluted  
36 1/1000 in TBS-T with 5% BSA (Sigma-Aldrich, Stockholm, Sweden): pMLKL (abcam#196436),  
37 cleaved caspase-3 (Cell Signaling, Beverly, USA, #9664), cleaved PARP (Cell Signaling, Beverly,  
38 USA #9544), caspase-8 (Cell Signaling, Beverly, USA #8592), RIP3 (Cell Signaling, Beverly, USA  
39 #15828), and GAPDH (Cell Signaling, Beverly, USA #5174). Membranes were incubated with  
40 primary antibodies at 4 C. Membranes where then washed in TBS-T with 5% milk or 5% BSA,  
41 for 2x 15 minutes and then washed in TBS-T for additional 15 minutes. Anti-rabbit secondary  
42 antibodies #31460 (Thermo Scientific, Waltham, USA) or anti-rabbit # 7074 (Cell Signaling,  
43 Beverly, USA) conjugated to HRP were directed towards primary antibodies and incubated for 1  
44 hour. pMLKL were stripped for RIP3 and caspase-8 with western blot stripping buffer (Thermo  
45 Scientific, Waltham, USA). Proteins were visualized with West Femto SuperSignal detection kit  
46 (Thermo Scientific, Waltham, USA) and optical density from the bands was detected by using LI-  
47 COR odyssey Fc imager system (LI-COR, Lincoln, USA). Ratio of optical band density between  
48 samples and GAPDH were calculated in Microsoft Excel and normalized towards saline or wild-  
49 type HDM/dsRNA. The mean of the normalized optical density are presented.

50

### 51 **TUNEL staining**

52 *In situ* cell death detection kit fluorescein (Roche, Mannheim, Germany) was used for TUNEL  
53 analysis. Sections were deparaffinized and gradually rehydrated. Antigen-retrieval was performed  
54 by addition of 20  $\mu$ L of 20 mg/ml proteinase K (Sigma-Aldrich, Stockholm, Sweden) during 20  
55 minutes at 37 °C. TUNEL mixture was then added to all sections and incubated 1 hour at 37 °C.

56 Sections were then washed and Nucblue (DAPI) (Thermo Scientific, Waltham, USA) was added  
57 to sections for 5 min in order to stain the nucleus. Tissue sections were finally mounted using  
58 aqua pertex (HistoLab, Gothenburg, Sweden) and analyzed under fluorescent microscope (Nikon  
59 Eclipse 80i, Tokyo, Japan)

60

#### 61 **LDH assay**

62 LDH levels in BALF were measured by cytotoxicity detection kit according to manufactures  
63 protocol (Roche, Stockholm, Sweden).

64

#### 65 **RNA isolation and gene expression quantification by RT-qPCR**

66 RNA extraction kit Nucleospin® RNA II (Macherey-Nagel, Düren, Germany) was used to isolate  
67 total RNA from right lung lobe homogenate and reverse transcribed to cDNA with Precision  
68 Nanoscript Reverse Transcription kit (PrimerDesign, Southampton, UK). RT- qPCR was run on  
69 an Mx3005P qPCR system (Stratagen, La Jolla, USA). Primers were obtained from (Qiagen,  
70 Stockholm, Sweden) and (PrimerDesign, Southampton UK). Analysis of samples was performed  
71 by the  $\Delta\Delta C_t$  method and related to 18S expression as previously described (1). Groups where  
72 normalized to saline/saline group.

73

#### 74 **References**

75 (1) Livak, K. J., & Schmittgen, T. D. (2001). Analysis of relative gene expression data using  
76 real-time quantitative PCR and the  $2^{-\Delta\Delta C_T}$  method. *methods*, 25(4), 402-408.

77

78

Figure S1

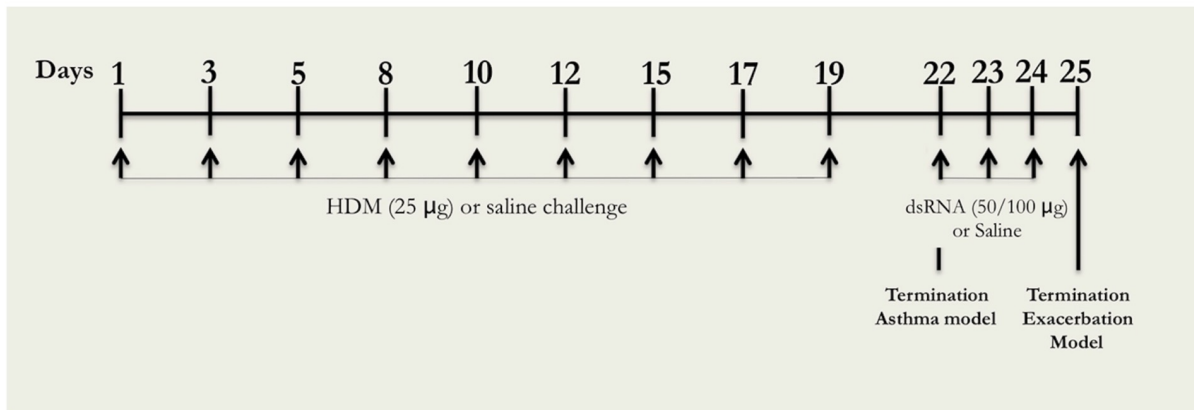

79

Figure S2

■ Wild-type (WT)  
 ■ IFN- $\beta^{-/-}$  (KO)

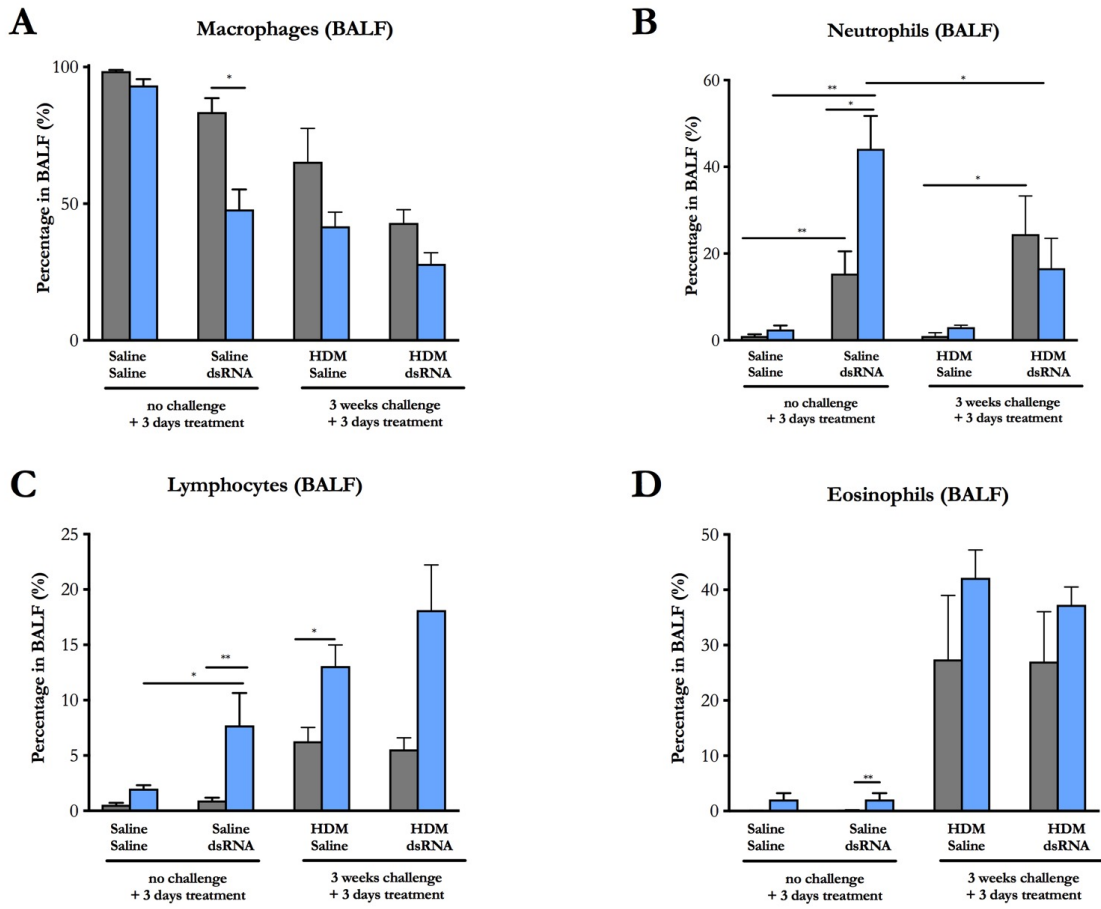

80  
81

82

### 83 **Supplementary figure legends**

84

#### 85 **Figure S1: Study Design.**

86 Mice were challenged with 25  $\mu\text{g}$  HDM or saline intranasally 3 times/week for 3  
87 weeks. For the exacerbation model, HDM or saline challenged mice received 50  $\mu\text{g}$   
88 or 100  $\mu\text{g}$  dsRNA or saline for 3 additional days.

89

90

#### 91 **Figure S2: Differential cell count in BALF.**

92 **(A)** Percentage macrophages in BALF. **(B)** Percentage neutrophils in BALF. **(C)**. Percentage  
93 lymphocytes in BALF. **(D)** Percentage eosinophils in BALF. The data are presented as  
94 mean+SEM (%) (n=4-10).

95

96

97

98
